# Supplementary material for: Electronic Structures and Optical Properties of Phenyl C71 Butyric Acid Methyl Esters
Source: Hindawi journal article supplement (doi:10.1155/2013/612153), 2013-01-01
Supplement: f1 [file 612153.f1.pdf]

**Table s1:** The selected bond lengths (in Å), bond angles (in degree) and dihedral angles (in degree) of [6,6]PC<sub>71</sub>BM in gas phase (B3LYP/6-31G(d,p)).

| Definition | Value | Definition | Value | Definition  | Value  |
|------------|-------|------------|-------|-------------|--------|
| 15-71      | 1.52  | 14-15-16   | 103.5 | 15-5-71-73  | -105.1 |
| 5-71       | 1.52  | 13-14-26   | 118.4 | 15-5-71-72  | 115.5  |
| 5-15       | 1.63  | 16-15-5    | 115.4 | 16-15-5-4   | -120.4 |
| 71-73      | 1.52  | 14-15-5    | 115.5 | 73-71-72-74 | -179.9 |
| 71-72      | 1.55  | 15-71-5    | 64.9  | 74-80-81-83 | -1.6   |
| 72-74      | 1.53  | 15-71-73   | 116.0 | 84-82-81-83 | -0.1   |
| 81-83      | 1.21  | 15-71-72   | 124.1 | 80-81-82-84 | 179.7  |
| 81-82      | 1.35  | 71-72-74   | 123.6 |             |        |
| 82-84      | 1.44  | 82-81-83   | 123.5 |             |        |
| 14-15      | 1.49  | 80-81-83   | 125.7 |             |        |
| 15-16      | 1.49  | 81-82-84   | 115.3 |             |        |

**Table s2:** the selected bond lengths (in Å), bond angles (in degree) and dihedral angles (in degree) of [5,6]PC<sub>71</sub>BM in gas phase (B3LYP/6-31G(d,p)).

| Definition | Value | Definition | Value | Definition  | Value  |
|------------|-------|------------|-------|-------------|--------|
| 14-71      | 1.51  | 11-12-13   | 106.1 | 14-15-71-73 | -114.5 |
| 15-71      | 1.51  | 13-14-26   | 114.2 | 14-15-71-72 | 124.8  |
| 14-15      | 2.13  | 26-14-15   | 97.3  | 26-14-15-5  | -119.8 |
| 71-73      | 1.54  | 13-14-15   | 108.3 | 73-71-72-74 | 178.9  |
| 71-72      | 1.57  | 14-71-15   | 89.4  | 74-80-81-83 | 3.1    |
| 72-74      | 1.54  | 14-71-73   | 112.8 | 84-82-81-83 | 0.2    |
| 81-83      | 1.21  | 14-71-72   | 120.0 | 80-81-82-84 | -179.6 |
| 81-82      | 1.35  | 71-72-74   | 126.2 |             |        |
| 82-84      | 1.44  | 82-81-83   | 123.5 |             |        |
| 13-14      | 1.40  | 80-81-83   | 125.8 |             |        |
| 14-26      | 1.47  | 81-82-84   | 115.3 |             |        |
